# Supplementary material
Source: Springer Nature journal article supplement (https://www.springermedizin.de/resource/supplementary/12913_2007_664_MOESM2_ESM.pdf/9535932)
Supplement: MOESM2 [file 9535932]

## Question 1

You are told to follow the sliding scale shown here. The sliding scale indicates the amount of insulin you take based upon your blood sugar levels.

| If Blood sugar is: | Units of Insulin |
|--------------------|------------------|
| 130-180            | 0                |
| 181-230            | 1                |
| 231-280            | 2                |
| 281-330            | 3                |
| 331-380            | 4                |

How much insulin would you take for a blood sugar of 295?

**ANSWER \_\_\_\_ units**

**Correct answer: 3 units**

**Percent answered correctly 85%**

## Question 2

After seeing the Doctor, you are given the following instruction to lower a high blood sugar level before a meal:

**“Starting with a blood sugar of 120, take 1 unit of Humalog insulin for each 50 points of blood sugar.”**

How much insulin should you take for a blood sugar of 375?

**ANSWER \_\_\_\_ units**

**Correct: 5 units**

**Percent answered correctly 37%**
